# Supplementary material for: TIP55, a splice isoform of the KAT5 acetyltransferase, is essential for developmental gene regulation and organogenesis
Source: PubMed Central journal article supplement (PMC6175934; doi:10.1038/s41598-018-33213-4), 2018-10-08

**Supplementary Information for:**

**TIP55, a splice isoform of the KAT5 acetyltransferase, is essential for developmental gene regulation and organogenesis**

Diwash Acharya, Bernadette Nera, Zachary J. Milstone, Lauren Bourke, Yeonsoo Yoon, Jaime A. Rivera-Pérez, Chinmay M. Trivedi, Thomas G. Fazzio

**Contents:**

**Tables S1-S2**

**Figures S1-S3**

## Supplementary Tables

### Table S1. Changes in gene expression in *Tip55<sup>ΔΔ</sup>* embryos.

(excel file, provided separately)

### Table S2. Primer sequences

#### RT-PCR primers

|                                |                                                                          |
|--------------------------------|--------------------------------------------------------------------------|
| <i>Kat5</i> isoforms (all)     | Forward (a): ACGCCACTTGACCAAATGTGA<br>Reverse (b): TACTGGCCCTTGTAGTAATTG |
| <i>Tip55</i> specific isoform  | Forward (a): ACGCCACTTGACCAAATGTGA<br>Reverse (c): TACTCACTGAACTCAATAAGC |
| <i>Tip60β</i> specific isoform | Forward: GATGAGTGGCCCCTGGCTGAGAT<br>Reverse: TCCACCTTCCGTTTCACCTCTCT     |
| <i>LTip60</i> specific isoform | Forward: TGTCTCCCCAGGGGGAGATAATCGA<br>Reverse: GGAGGCCGGCACCTCTCTTTTC    |
| <i>Gata1</i>                   | Forward: AGGGCAGAATCCACAAACTG<br>Reverse: CCACTAAGGTGGCTGAATCC           |
| <i>Klf1</i>                    | Forward: CGGGAAGAGCTACACCAAGA<br>Reverse: GAGCGAACCTCCAGTCACA            |
| <i>Cited4</i>                  | Forward: CAGCGCAGAAGAGAGGAGAT<br>Reverse: AGTCCCTGCAACTCAACCAG           |
| <i>Mix11</i>                   | Forward: CCATGTACCCAGACATCCACT<br>Reverse: ACTCTGGCGCCTGGACTT            |
| <i>Hesx1</i>                   | Forward: CCCAGAACCAGGTCGAAGTA<br>Reverse: CCAAATCTGGATTCTGTCTTCC         |
| <i>Gapdh</i>                   | Forward: TTGATGGCAACAATCTCCAC<br>Reverse: CGTCCCGTAGACAAAATGGT           |

Genotyping primers:

*Tip55* tail/embryo PCR

Forward: CAAGTGTTTCCTGGACCACA

Reverse: TTGCCATAGCCCCGGCGCT

## Supplementary Figure Legends

### Figure S1. Expression of *Kat5* isoforms in *Tip55<sup>Δ/Δ</sup>* mice.

(A) Schematic diagram of RT-PCR primer binding sites relative to exons present in *Tip55* or all other *Kat5* isoforms. (B) RT-PCR with indicated primer sets that detect *Tip55*, all other *Kat5* isoforms, or *Gapdh* as a control. The asterisk indicates a non-specific band in *Tip55<sup>Δ/Δ</sup>*. (C) Uncropped images of gels shown in (B).

**Figure S2. Developmental expression of *Kat5* isoforms.** RNA was isolated from wild type E7.5-E11.5 and converted to cDNA using Superscript III reverse transcriptase (Invitrogen). Primers specific for indicated splice isoforms were used for RT-qPCR, and calibrated against known quantities of standards specific for each isoform. Shown are the number of copies of each transcript per 400ng of RNA isolated from embryos at the indicated stages.

**Figure S3. Markers of cardiac and neural differentiation are expressed in *Tip55<sup>Δ/Δ</sup>* mice.** Immunofluorescence of cardiac troponin T (cTNT) (red) and Sox2 (green) on E8.5 embryo sections of *Tip55<sup>+/+</sup>* and *Tip55<sup>Δ/Δ</sup>* embryos, taken at 10X magnification to view multiple regions and 20X to focus on either the neural tube (Sox2) or the heart (cTNT).

Figure S1

A

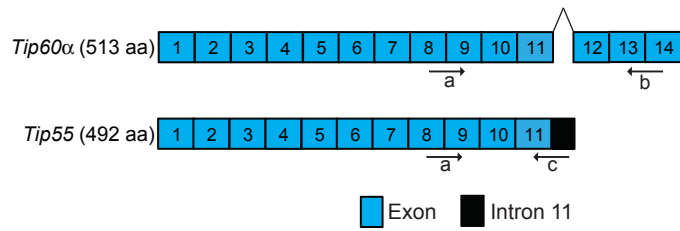

B

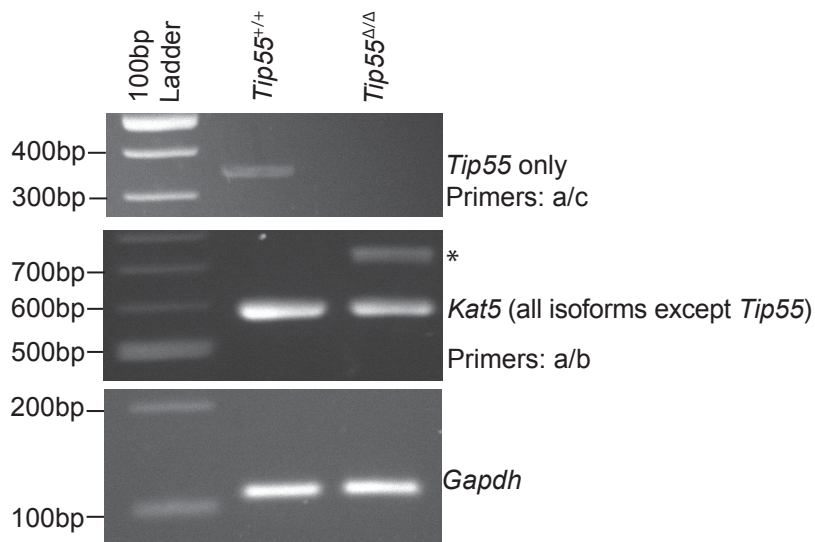

C

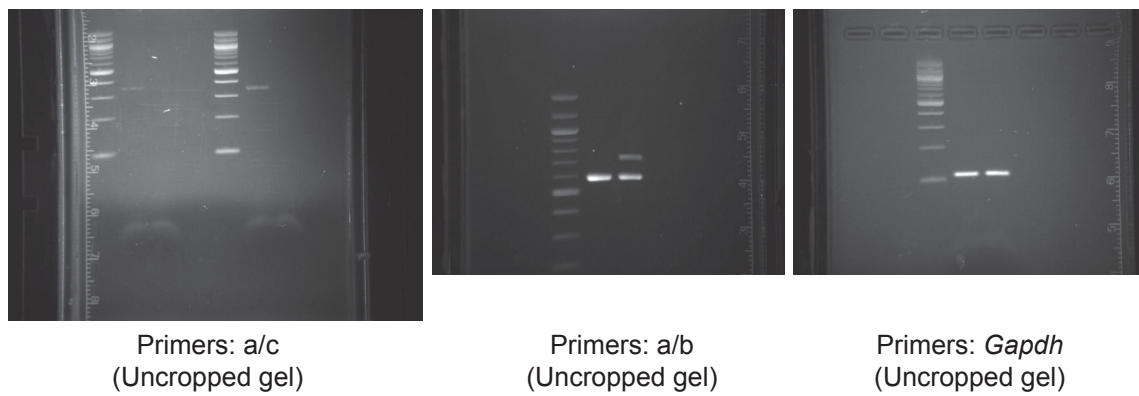

Figure S2

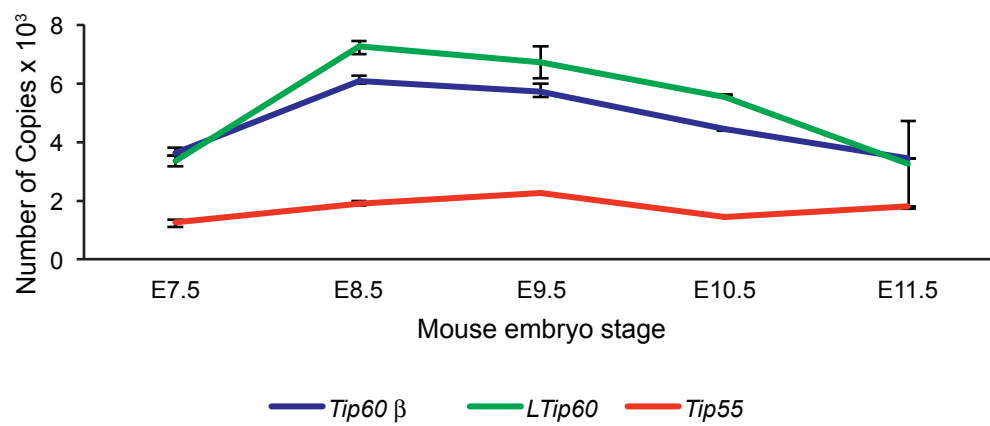

Figure S3

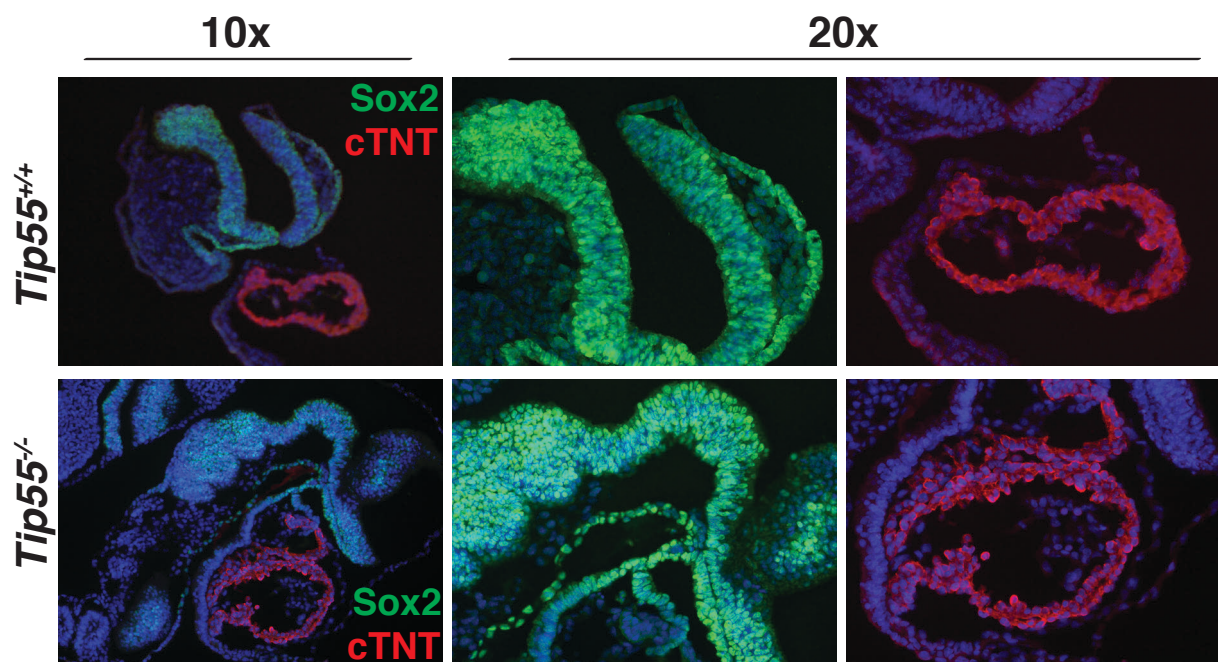

Supplement: 41598_2018_33213_MOESM1_ESM.pdf [file 41598_2018_33213_MOESM1_ESM.pdf]
